# Supplementary material
Source: ML conference proceedings conference paper supplement (https://proceedings.mlr.press/v164/yang22d.html)
Supplement: Supplementary file 1 [file yang22d-supp.zip]

Archive with 3 entries (3 files):
- __MACOSX/._appendix.pdf
- __MACOSX/._corl_camera_ready_lq.mp4
- appendix.pdf
